# Supplementary material for: Indices of peripheral leukocytes predict longer overall survival in breast cancer patients on eribulin in Japan
Source: PubMed Central journal article supplement (PMC8213560; doi:10.1007/s12282-021-01232-1), 2021-03-07
Supplement: 12282_2021_1232_MOESM1_ESM.pdf [file 12282_2021_1232_MOESM1_ESM.pdf]

## **Supplementary File**

**Article title:** Indices of peripheral leukocytes predict longer overall survival in breast cancer patients on eribulin in Japan

**Journal name:** *Breast Cancer*

**Author names:** Masato Takahashi, Kenichi Inoue, Hirofumi Mukai, Takashi Yamanaka, Chiyoimi Egawa, Yasuo Miyoshi, Yukinori Sakata, Kenzo Muramoto, Hiroki Ikezawa, Toshiyuki Matsuoka, Junji Tsurutani

### **Corresponding author:**

Masato Takahashi

Department of Breast Surgery

National Hospital Organization Hokkaido Cancer Center

2-3-54, Kikusuishijo, Shiroishi-ku, Sapporo, Hokkaido 003-0804, Japan

Tel: +81-11-811-9111

Fax: +81-11-811-9153

E-mail: [masato.takahashi0725@gmail.com](mailto:masato.takahashi0725@gmail.com)

**Table S1. Cutoff value of ALC as a predictor for the effect of eribulin on overall survival**

| ALC cutoff (/μL) | n   | Median OS (months) | HR    | 95% CI (Lower) | 95% CI (Upper) | p value         |
|------------------|-----|--------------------|-------|----------------|----------------|-----------------|
| ≥1000            | 359 | 17.3               | 0.695 | 0.560          | 0.862          | <i>p</i> <0.001 |
| <1000 (Ref.)     | 201 | 14.2               |       |                |                |                 |
| ≥1100            | 322 | 17.6               | 0.685 | 0.554          | 0.846          | <i>p</i> <0.001 |
| <1100 (Ref.)     | 238 | 14.2               |       |                |                |                 |
| ≥1200            | 274 | 18.5               | 0.641 | 0.517          | 0.793          | <i>p</i> <0.001 |
| <1200 (Ref.)     | 286 | 14.2               |       |                |                |                 |
| ≥1300            | 237 | 18.5               | 0.673 | 0.541          | 0.837          | <i>p</i> <0.001 |
| <1300 (Ref.)     | 323 | 14.3               |       |                |                |                 |
| ≥1400            | 196 | 18.8               | 0.695 | 0.552          | 0.873          | <i>p</i> =0.002 |
| <1400 (Ref.)     | 364 | 14.5               |       |                |                |                 |
| ≥1500            | 170 | 19.4               | 0.628 | 0.492          | 0.801          | <i>p</i> <0.001 |
| <1500 (Ref.)     | 390 | 14.3               |       |                |                |                 |
| ≥1600            | 144 | 18.5               | 0.691 | 0.537          | 0.891          | <i>p</i> =0.004 |
| <1600 (Ref.)     | 416 | 14.7               |       |                |                |                 |
| ≥1700            | 113 | 18.4               | 0.755 | 0.574          | 0.994          | <i>p</i> =0.044 |
| <1700 (Ref.)     | 447 | 15.5               |       |                |                |                 |
| ≥1800            | 89  | 18.8               | 0.726 | 0.537          | 0.983          | <i>p</i> =0.037 |
| <1800 (Ref.)     | 471 | 15.5               |       |                |                |                 |

ALC, absolute lymphocyte count; CI, confidence interval; HR, hazard ratio; NLR, neutrophil-to-lymphocyte ratio; OS, overall survival; Ref, reference.

**1) Eribulin as first-line**

(a) ALC

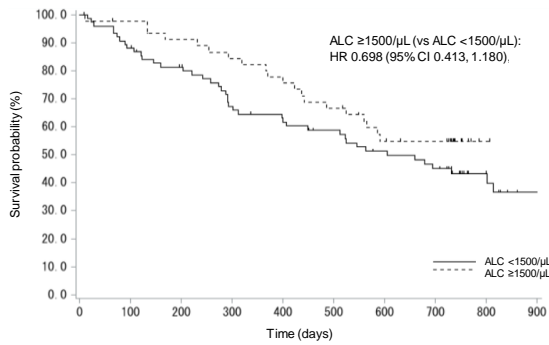

|              | Median OS months, (95% CI) | Time after eribulin treatment | Number of patients at risk | Survival rate | (95% CI)     |
|--------------|----------------------------|-------------------------------|----------------------------|---------------|--------------|
| ALC <1500/μL | (13.1, 26.8)               | 6 months                      | 60                         | 81.4          | (70.6, 88.5) |
|              |                            | 1 year                        | 45                         | 64.6          | (52.4, 74.3) |
|              |                            | 2 years                       | 26                         | 45.1          | (33.1, 56.3) |
| ALC ≥1500/μL | (17.3, —)                  | 6 months                      | 41                         | 91.2          | (78.1, 96.6) |
|              |                            | 1 year                        | 37                         | 82.3          | (67.6, 90.7) |
|              |                            | 2 years                       | 18                         | 54.9          | (39.1, 68.1) |

(b) NLR

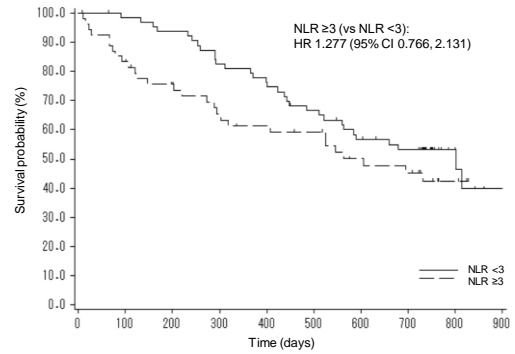

|        | Median OS months, (95% CI) | Time after eribulin treatment | Number of patients at risk | Survival rate | (95% CI)     |
|--------|----------------------------|-------------------------------|----------------------------|---------------|--------------|
| NLR <3 | (18.4, 31.0)               | 6 months                      | 59                         | 93.7          | (84.0, 97.6) |
|        |                            | 1 year                        | 51                         | 81.0          | (68.9, 88.7) |
|        |                            | 2 years                       | 27                         | 53.2          | (40.0, 64.7) |
| NLR ≥3 | (9.9, —)                   | 6 months                      | 39                         | 75.6          | (61.7, 85.1) |
|        |                            | 1 year                        | 29                         | 61.3          | (46.6, 73.1) |
|        |                            | 2 years                       | 16                         | 45.3          | (30.8, 58.7) |

**2) Eribulin as second-line**

(a) ALC

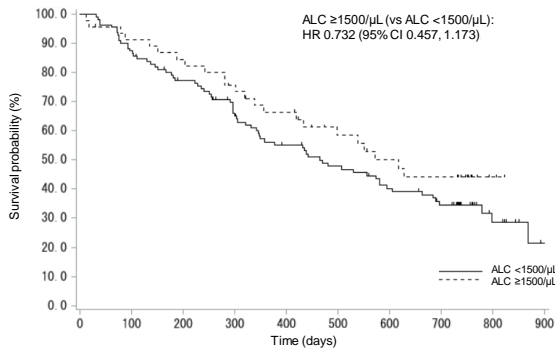

|              | Median OS months, (95% CI) | Time after eribulin treatment | Number of patients at risk | Survival rate | (95% CI)     |
|--------------|----------------------------|-------------------------------|----------------------------|---------------|--------------|
| ALC <1500/μL | (11.3, 19.6)               | 6 months                      | 86                         | 79.2          | (70.4, 85.7) |
|              |                            | 1 year                        | 57                         | 56.1          | (46.2, 65.0) |
|              |                            | 2 years                       | 26                         | 34.7          | (25.4, 44.1) |
| ALC ≥1500/μL | (13.8, —)                  | 6 months                      | 39                         | 86.8          | (72.9, 93.8) |
|              |                            | 1 year                        | 28                         | 66.3          | (50.4, 78.2) |
|              |                            | 2 years                       | 15                         | 44.1          | (28.3, 58.9) |

(b) NLR

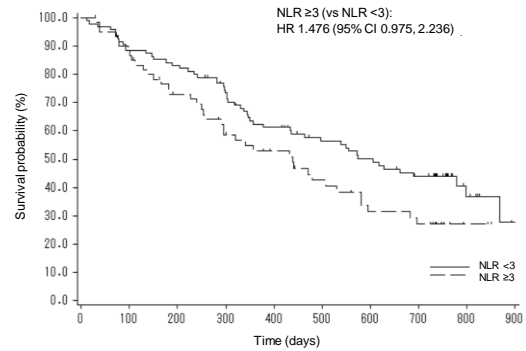

|        | Median OS months, (95% CI) | Time after eribulin treatment | Number of patients at risk | Survival rate | (95% CI)     |
|--------|----------------------------|-------------------------------|----------------------------|---------------|--------------|
| NLR <3 | (14.2, 26.2)               | 6 months                      | 80                         | 84.2          | (75.2, 90.2) |
|        |                            | 1 year                        | 56                         | 62.4          | (51.7, 71.4) |
|        |                            | 2 years                       | 32                         | 44.0          | (33.3, 54.1) |
| NLR ≥3 | (9.5, 19.1)                | 6 months                      | 44                         | 76.5          | (63.5, 85.3) |
|        |                            | 1 year                        | 28                         | 52.9          | (39.2, 64.9) |
|        |                            | 2 years                       | 9                          | 27.0          | (15.5, 39.9) |

**3) Eribulin as third or later-line**

(a) ALC

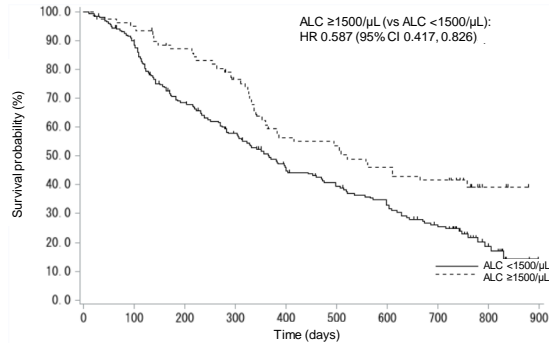

|              | Median OS months, (95% CI) | Time after eribulin treatment | Number of patients at risk | Survival rate | (95% CI)     |
|--------------|----------------------------|-------------------------------|----------------------------|---------------|--------------|
| ALC <1500/μL | (10.0, 15.1)               | 6 months                      | 135                        | 70.5          | (63.6, 76.4) |
|              |                            | 1 year                        | 89                         | 50.0          | (42.7, 56.9) |
|              |                            | 2 years                       | 35                         | 24.8          | (18.6, 31.4) |
| ALC ≥1500/μL | (11.8, —)                  | 6 months                      | 66                         | 87.1          | (77.3, 92.8) |
|              |                            | 1 year                        | 41                         | 59.4          | (47.2, 69.6) |
|              |                            | 2 years                       | 26                         | 41.6          | (30.0, 52.8) |

(b) NLR

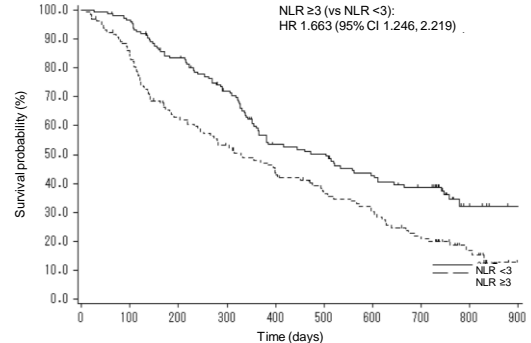

|        | Median OS months, (95% CI) | Time after eribulin treatment | Number of patients at risk | Survival rate | (95% CI)     |
|--------|----------------------------|-------------------------------|----------------------------|---------------|--------------|
| NLR <3 | (11.9, 20.1)               | 6 months                      | 120                        | 84.1          | (77.1, 89.2) |
|        |                            | 1 year                        | 74                         | 57.5          | (48.7, 65.3) |
|        |                            | 2 years                       | 41                         | 38.7          | (30.3, 47.0) |
| NLR ≥3 | (7.9, 14.9)                | 6 months                      | 80                         | 65.4          | (56.5, 73.0) |
|        |                            | 1 year                        | 56                         | 48.0          | (39.0, 56.5) |
|        |                            | 2 years                       | 20                         | 20.0          | (13.2, 27.8) |

**Fig. S1 Overall survival by baseline ALC, NLR, and the number of regimens**

ALC, absolute lymphocyte count; CI, confidence interval; HR, hazard ratio; NLR, neutrophil-to-lymphocyte ratio; OS, overall survival.
